# Supplementary material for: Study on the Material Basis of Houpo Wenzhong Decoction by HPLC Fingerprint, UHPLC-ESI-LTQ-Orbitrap-MS, and Network Pharmacology
Source: PubMed Central journal article supplement (PMC6681077; doi:10.3390/molecules24142561), 2019-07-14
Supplement: molecules-24-02561-s001.pdf [file molecules-24-02561-s001.pdf]

## Supplementary Materials

# Study on the Material Basis of Houpo Wenzhong Decoction by HPLC fingerprint, UHPLC-ESI-LTQ-Orbitrap-MS and Network Pharmacology

Juyuan Luo<sup>1</sup>, Gongsen Chen<sup>1</sup>, Donghan Liu<sup>1</sup>, Yan Wang<sup>1</sup>, Qi Qi<sup>1</sup>, Haiyan Hu<sup>1</sup>, Pengyue Li<sup>1</sup>, Jie Bai<sup>1,\*</sup>, Shouying Du<sup>1,\*</sup>, Yang Lu<sup>1,\*</sup>, Yuming Wang<sup>2</sup> and Cun Liu<sup>2</sup>

<sup>1</sup> School of Chinese Materia Medica, Beijing University of Chinese Medicine, Yangguang South Avenue, Fangshan District, Beijing 102488, China; luojoy0329@163.com (J.L.); gongsenchen@163.com (G.C.); liudonghan80@163.com (D.L.); wy18713922886@163.com (Y.W.); doubleseven776@163.com (Q.Q.);

xyyhhy@163.com (H.H.); pengyuelee@126.com (P.L.);

<sup>2</sup> Yifan Pharmaceutical Co.,Ltd, Lin an, Zhejiang 311300, China; wangyuming@yifanyy.com (Y.W.); liucun@yifanyy.com (C.L.)

\* Correspondence: baijie22811@163.com (J.B.); dusy@bucm.edu.cn (S.D.); landocean28@163.com (Y.L.); Tel.: +86-010-8473-8657 (J.B.), +86-010-8473-8615 (S.D.), +86-010-5391-2123 (Y.L.).

**Table S1.** Sources and batch numbers of TCM in fifteen batches of HWD samples.

| SN  | <i>Magnolia officinalis</i><br><i>Cortex</i> |                   | <i>Citri Reticulatae</i><br><i>Pericarpium</i> |                     | <i>Radix aucklandiae</i> |                  | <i>Semen Alpiniae</i><br><i>Katsumadai</i> |                | <i>Glycyrrhiza uralensis</i><br><i>Fisch</i> |                       | <i>Poria cocos</i> |                  | <i>Rhizoma Zingiberis</i> |                    |
|-----|----------------------------------------------|-------------------|------------------------------------------------|---------------------|--------------------------|------------------|--------------------------------------------|----------------|----------------------------------------------|-----------------------|--------------------|------------------|---------------------------|--------------------|
|     | BN                                           | Origins           | BN                                             | Origins             | BN                       | Origins          | BN                                         | Origins        | BN                                           | Origins               | BN                 | Origins          | BN                        | Origins            |
| S1  | HP-14                                        | Enshi, Hubei      | CP-2                                           | Yibin, Sichuan      | MX-2                     | Lijiang, Yunnan  | CDK-3                                      | Haikou, Hainan | GC-10                                        | Ordos, Inner Mongolia | FL-3               | Shangluo, Shanxi | GJ-2                      | Qianwei, Sichuan   |
| S2  | HP-11                                        | Enshi, Hubei      | CP-2                                           | Yibin, Sichuan      | MX-3                     | Lijiang, Yunnan  | CDK-2                                      | Cenxi, Guangxi | GC-13                                        | Ordos, Inner Mongolia | FL-2               | Yuexi, Anhui     | GJ-1                      | Yunnan             |
| S3  | HP-13                                        | Enshi, Hubei      | CP-4                                           | Guangdong           | MX-6                     | Chuxiong, Yunnan | CDK-3                                      | Haikou, Hainan | GC-2                                         | Longxi, Gansu         | FL-2               | Yuexi, Anhui     | GJ-2                      | Qianwei, Sichuan   |
| S4  | HP-4                                         | Beichuan, Sichuan | CP-8                                           | Chengdu, Sichuan    | MX-8                     | Heqing, Yunnan   | CDK-2                                      | Cenxi, Guangxi | GC-3                                         | Longxi, Gansu         | FL-1               | Yunnan           | GJ-6                      | Changshun, Guizhou |
| S5  | HP-2                                         | Beichuan, Sichuan | CP-6                                           | Hangzhou, Zhejiang  | CP-5                     | Lijiang, Yunnan  | CDK-3                                      | Haikou, Hainan | GC-11                                        | Ordos, Inner Mongolia | FL-3               | Shangluo, Shanxi | GJ-2                      | Qianwei, Sichuan   |
| S6  | HP-8                                         | Pingwu, Sichuan   | CP-5                                           | Longyan, Fujian     | CP-5                     | Lijiang, Yunnan  | CDK-3                                      | Haikou, Hainan | GC-4                                         | Longxi, Gansu         | FL-3               | Shangluo, Shanxi | GJ-6                      | Changshun, Guizhou |
| S7  | HP-9                                         | Pingwu, Sichuan   | CP-5                                           | Longyan, Fujian     | MX-1                     | Lijiang, Yunnan  | CDK-2                                      | Cenxi, Guangxi | GC-12                                        | Ordos, Inner Mongolia | FL-1               | Yunnan           | GJ-5                      | Guizhou            |
| S8  | HP-7                                         | Pingwu, Sichuan   | CP-1                                           | Yibin, Sichuan      | MX-8                     | Heqing, Yunnan   | CDK-1                                      | Yunnan         | GC-15                                        | Ordos, Inner Mongolia | FL-2               | Yuexi, Anhui     | GJ-1                      | Yunnan             |
| S9  | HP-3                                         | Beichuan, Sichuan | CP-3                                           | Yibin, Sichuan      | MX-7                     | Chuxiong, Yunnan | CDK-1                                      | Yunnan         | GC-1                                         | Longxi, Gansu         | FL-1               | Yunnan           | GJ-4                      | Qianwei, Sichuan   |
| S10 | HP-15                                        | Wanyuan, Sichuan  | CP-6                                           | Hangzhou, Zhejiang  | MX-1                     | Lijiang, Yunnan  | CDK-1                                      | Yunnan         | GC-5                                         | Longxi, Gansu         | FL-1               | Yunnan           | GJ-3                      | Qianwei, Sichuan   |
| S11 | HP-6                                         | Pingwu, Sichuan   | CP-7                                           | Jiangmen, Guangdong | MX-7                     | Chuxiong, Yunnan | CDK-1                                      | Yunnan         | GC-9                                         | Altay, Xinjiang       | FL-1               | Yunnan           | GJ-4                      | Qianwei, Sichuan   |
| S12 | HP-12                                        | Enshi, Hubei      | CP-1                                           | Yibin, Sichuan      | MX-6                     | Chuxiong, Yunnan | CDK-2                                      | Cenxi, Guangxi | GC-8                                         | Altay, Xinjiang       | FL-3               | Shangluo, Shanxi | GJ-4                      | Qianwei, Sichuan   |
| S13 | HP-1                                         | Beichuan, Sichuan | CP-4                                           | Guangdong           | MX-3                     | Lijiang, Yunnan  | CDK-3                                      | Haikou, Hainan | GC-14                                        | Ordos, Inner Mongolia | FL-2               | Yuexi, Anhui     | GJ-6                      | Changshun, Guizhou |
| S14 | HP-10                                        | Enshi, Hubei      | CP-8                                           | Chengdu, Sichuan    | MX-2                     | Lijiang, Yunnan  | CDK-1                                      | Yunnan         | GC-6                                         | Altay, Xinjiang       | FL-2               | Yuexi, Anhui     | GJ-3                      | Qianwei, Sichuan   |

|     |      |                    |      |                        |      |                    |       |                   |      |                 |      |                     |      |         |
|-----|------|--------------------|------|------------------------|------|--------------------|-------|-------------------|------|-----------------|------|---------------------|------|---------|
| S15 | HP-5 | Pingwu,<br>Sichuan | CP-7 | Jiangmen,<br>Guangdong | MX-4 | Lijiang,<br>Yunnan | CDK-2 | Cenxi,<br>Guangxi | GC-7 | Altay, Xinjiang | FL-3 | Shangluo,<br>Shanxi | GJ-5 | Guizhou |
|-----|------|--------------------|------|------------------------|------|--------------------|-------|-------------------|------|-----------------|------|---------------------|------|---------|

SN: sample number, BN: Batch number.

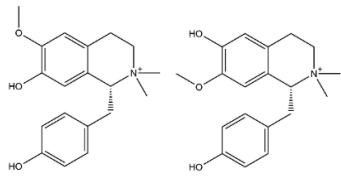

1. Magnocurarine or Lotusine

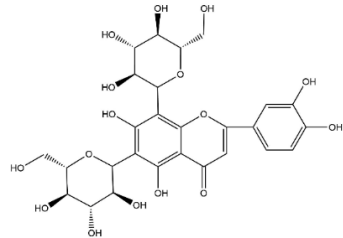

2. Lutcolin-6,8-di-C-glycoside

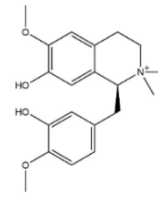

3. Tembatazine

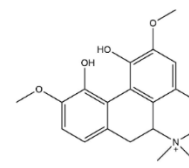

4. Magnoflorine

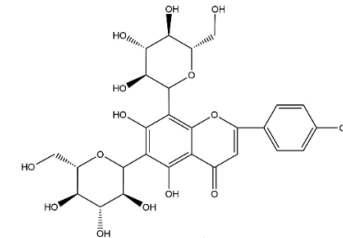

5. Vicenin-2

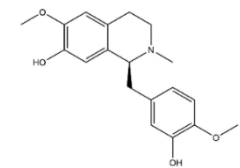

6. Reticuline

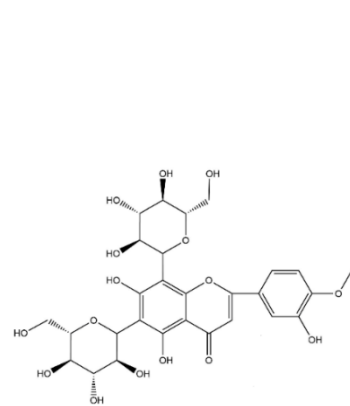

7. Diosmetin 6,8-di-C-glycoside

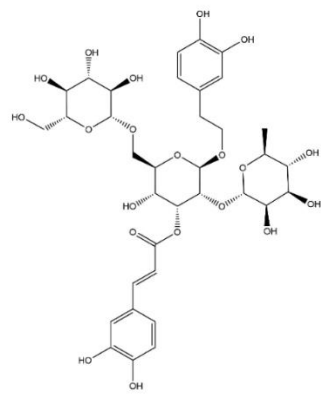

8. Magnolioside B

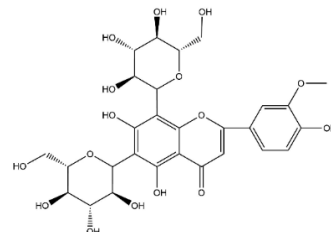

9. Chrysoeriol 6,8-di-C-glycoside

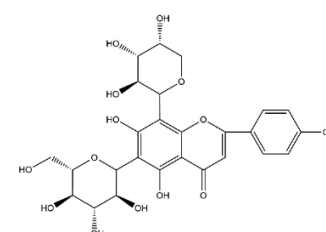

10. Schafferside

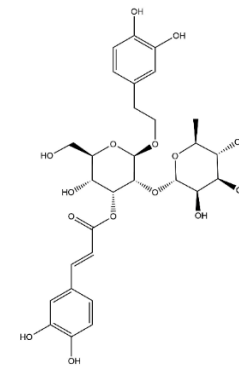

11. Magnolioside A

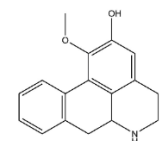

12. Asimilobine

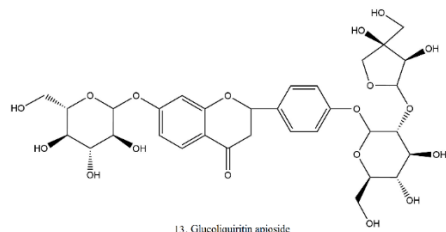

13. Gluciquiritin apioside

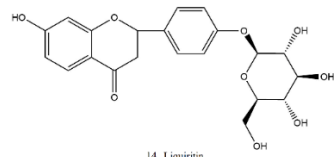

14. Liquiritin

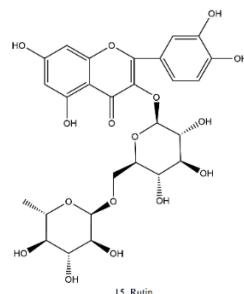

15. Rutin

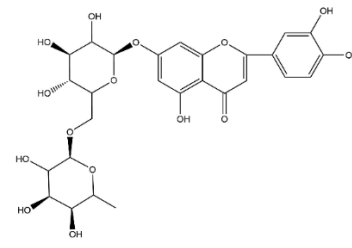

16. Luteolin-7-rutinoside

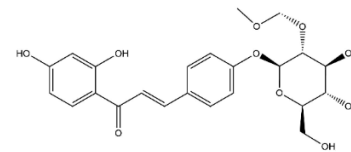

17. Eriocitrin

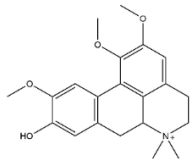

18. Xanthopline

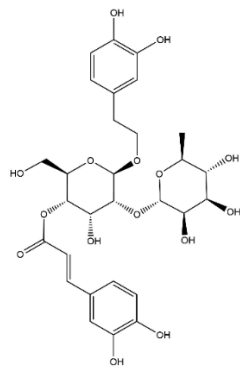

19. Magnolide M

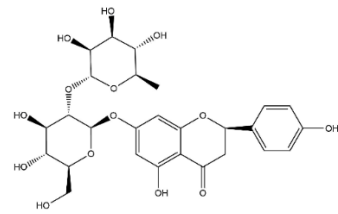

20. Naringin

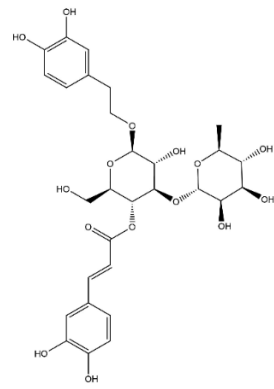

21. Verbascoside

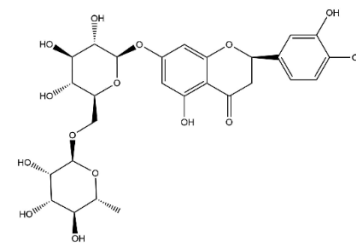

22. Hesperidin

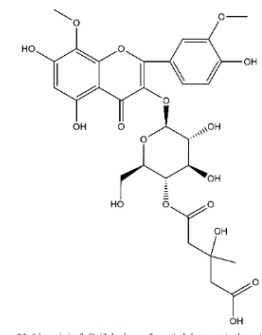

23. 1,1-dimocitrin-3-O-(1-hydroxy-3-methylglutarate)-glucoside or isomers

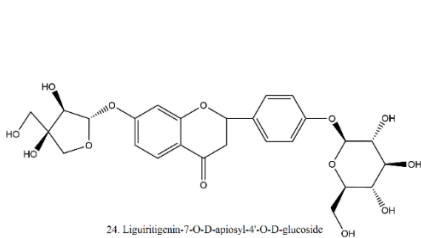

24. Liquiritigenin-7-O-D-apiosyl-4'-O-D-glucoside

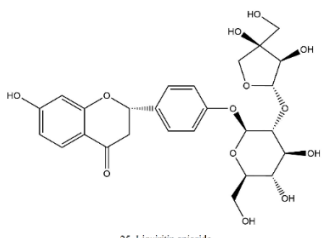

25. Liquiritin apioside

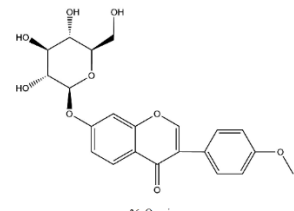

26. Ononin

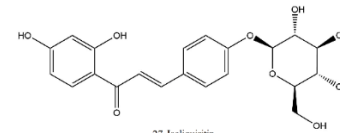

27. Isoliquiritin

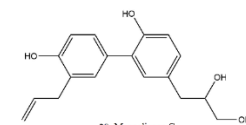

28. Magnolignan C

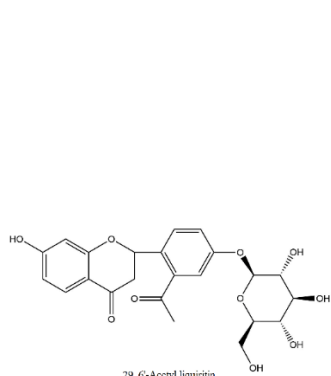

29. 6'-Acetyl liquiritin

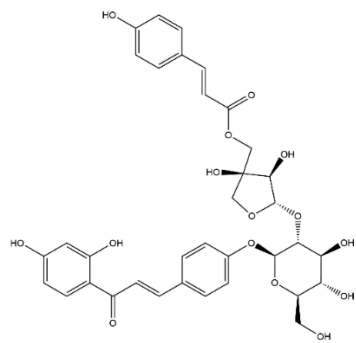

30. Licorice glycoside B

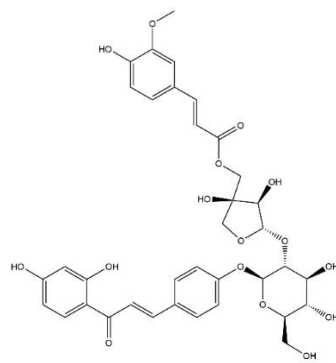

31. Licorice glycoside A

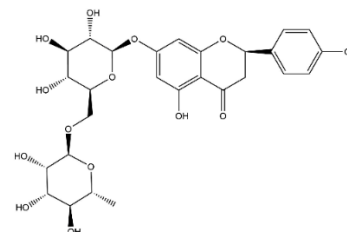

32. Didymin or Poirarin

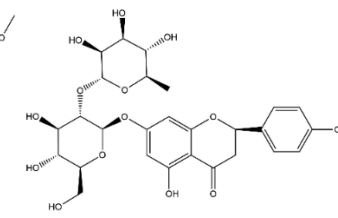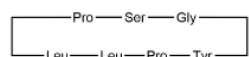

33. Citrusin III

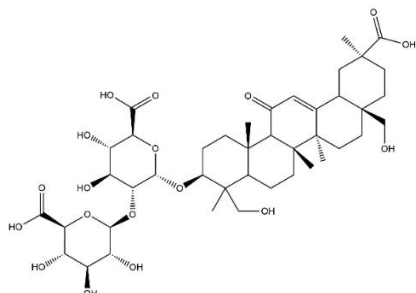

34. Dihydroxy glycyrrhizic acid

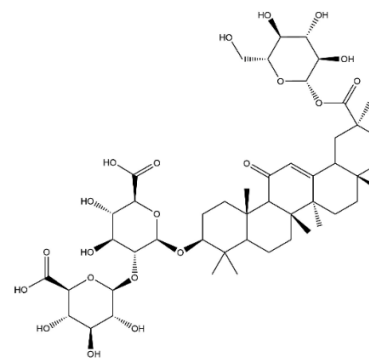

35. Licorice saponin A3

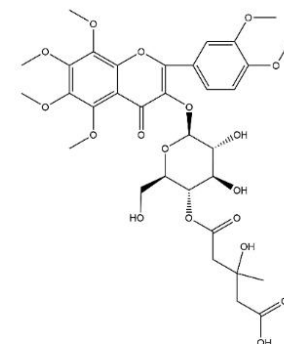

36. Natsudaidin 3-(4-O-3-hydroxy-3-methylglutarylglucoside)

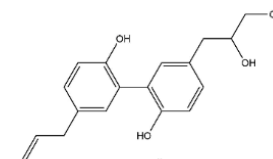

37. Magnolignan A

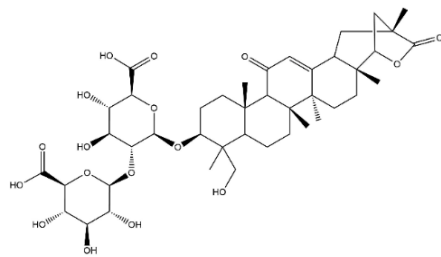

38. 24-Hydroxy-3beta-(2-O-beta-D-glucopyranuronosyl-4-beta-D-glucopyranuronosyl oxy)-11-oxo-22beta-hydroxyoleana-12-ene-30-oic acid gamma-lactone

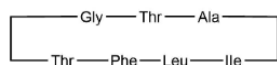

39. Citrusin I

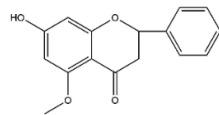

40. Alpinetin

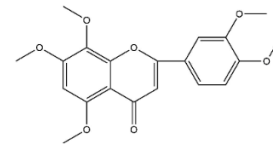

41. Icosinensetin

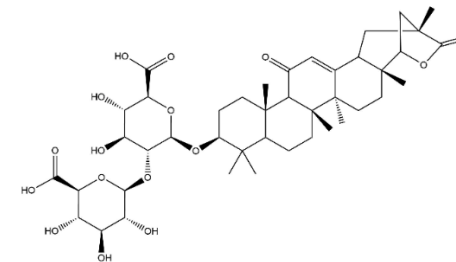

42. Licorice saponin E2

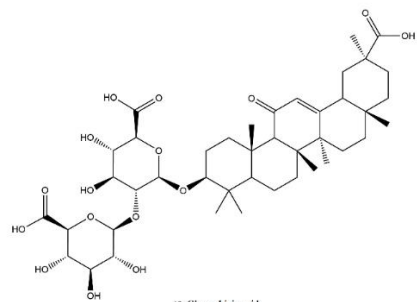

43. Glycyrrhizic acid

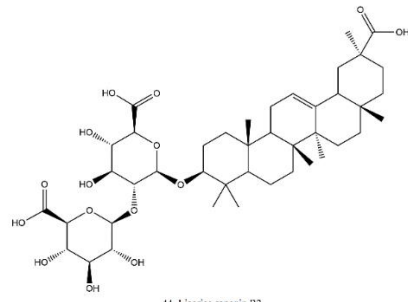

44. Licorice saponin B2

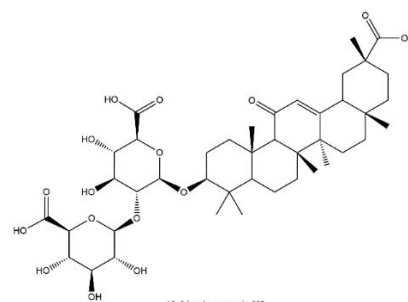

45. Licorice saponin H2

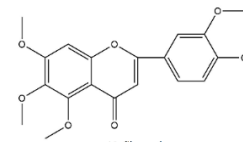

46. Sinensetin

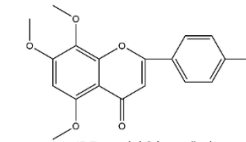

47. Tetramethyl-O-isocitellarin

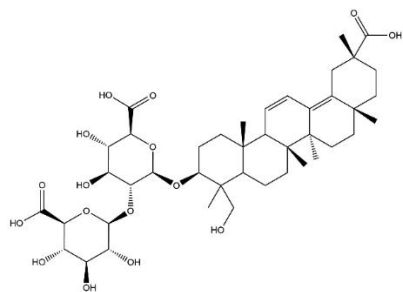

48. Licorice saponin K2

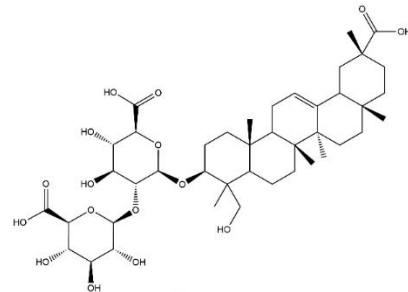

49. Licorice saponin J2

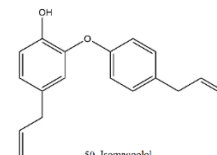

50. Isonagnanol

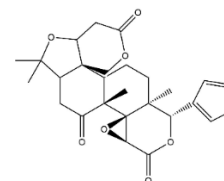

51. Fämonin

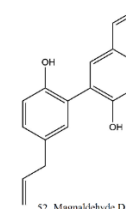

52. Magnaldehyde D

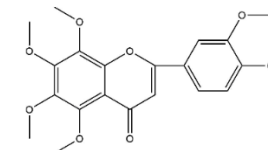

53. Nobiletin

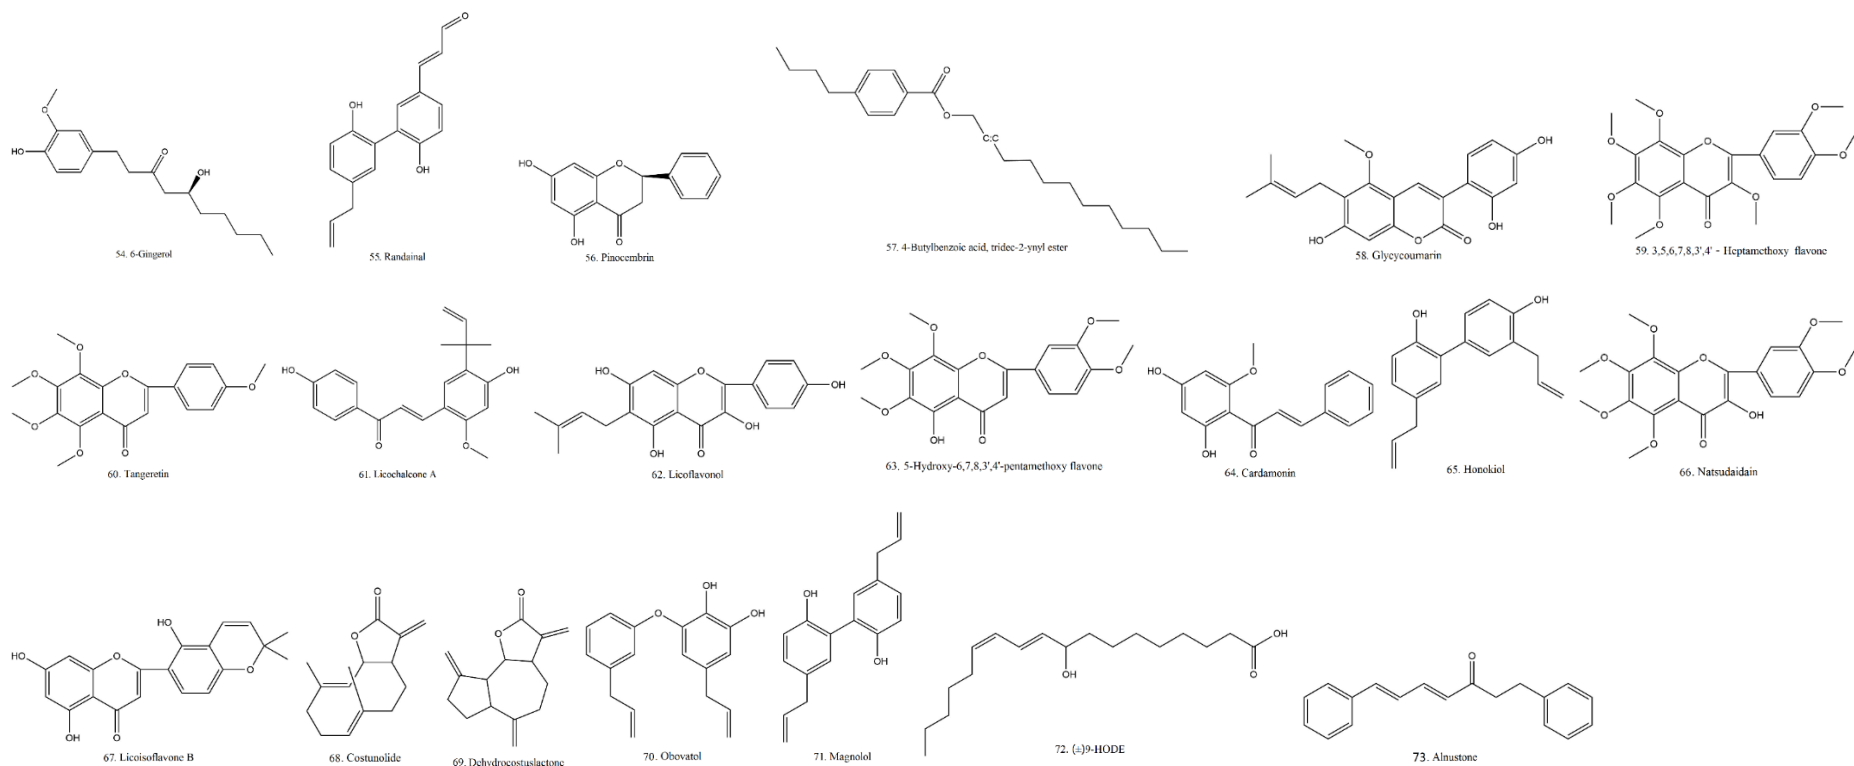

**Figure S1.** Structural Formulas of 73 Chemical Constituents.

**Table S2.** Detailed information on 88 chemical constituents of HWD and seven drugs.

| Peak | RT (min) | Category   | Compound                    | Molecular Formula                                            | Molecular Mass | [M+H] <sup>+</sup> (m/z) | [M+H] <sup>+</sup> (m/z) (Δ ppm) | MSn Fragment Ions                                                                                                                      | [M-H] <sup>-</sup> (m/z) | [M-H] <sup>-</sup> (m/z) (Δ ppm) | MSn Fragment Ions                     | Refs |
|------|----------|------------|-----------------------------|--------------------------------------------------------------|----------------|--------------------------|----------------------------------|----------------------------------------------------------------------------------------------------------------------------------------|--------------------------|----------------------------------|---------------------------------------|------|
| 1    | 27.43    | Alkaloids  | Magnocurarine or Lotusine   | C <sub>19</sub> H <sub>24</sub> NO <sub>3</sub> <sup>+</sup> | 314.17507      | 314.17426                | -2.578                           | 271.13245,<br>270.12021,<br>269.11679,<br>237.09068,<br>175.07504,<br>149.02299<br>593.18604,<br>575.35278,                            |                          |                                  | 489.11737,<br>399.15558,<br>369.09888 | [32] |
| 2    | 35.11    | Flavonoids | Luteolin-6,8-di-C-glucoside | C <sub>27</sub> H <sub>30</sub> O <sub>16</sub>              | 610.15284      | 611.15973                | -1.523                           | 557.18744,<br>473.26453,<br>353.22748<br>299.10132,<br>175.02397,<br>235.02451,<br>151.01923,<br>137.05937<br>297.11176,<br>282.08862, | 609.14612                | 1.820                            |                                       | [33] |
| 3    | 36.99    | Alkaloids  | Tembetarine                 | C <sub>20</sub> H <sub>26</sub> NO <sub>4</sub> <sup>+</sup> | 344.18563      | 344.18550                | -0.392                           | 282.08862,<br>265.08575,<br>237.09088<br>617.14673,<br>596.16821,<br>618.14996,                                                        |                          |                                  |                                       | [32] |
| 4    | 38.80    | Alkaloids  | Magnoflorine                | C <sub>20</sub> H <sub>24</sub> NO <sub>4</sub> <sup>+</sup> | 342.16998      | 342.16946                | -1.533                           | 577.15454,<br>437.23495,<br>301.14063,<br>149.02299                                                                                    |                          |                                  |                                       | [32] |
| 5    | 41.37    | Flavonoids | Vicenin-2                   | C <sub>27</sub> H <sub>30</sub> O <sub>15</sub>              | 594.15792      | 595.16473                | -1.708                           |                                                                                                                                        | 593.15106                | 1.624                            | 248.96034,<br>242.94347,<br>215.00986 | [34] |



|    |       |                      |                                |                      |           |           |        |                                                                                                                                         |           |       |                                                                                                             |      |                        |
|----|-------|----------------------|--------------------------------|----------------------|-----------|-----------|--------|-----------------------------------------------------------------------------------------------------------------------------------------|-----------|-------|-------------------------------------------------------------------------------------------------------------|------|------------------------|
| 6  | 44.11 | Alkaloids            | Reticuline                     | $C_{19}H_{23}NO_4$   | 329.16216 | 330.16940 | -1.771 | 301.14059,<br>299.12735,<br>271.26276,<br>247.05972,<br>192.10161,<br>163.03871,<br>150.02634,<br>149.02296,<br>137.05939,<br>136.02122 |           |       |                                                                                                             | [32] |                        |
| 7  | 45.71 | Flavonoids           | Diosmetin 6,8-di-C-glucoside   | $C_{28}H_{32}O_{16}$ | 624.16849 | 625.17493 | -2.209 | 626.17847,<br>647.15686,<br>648.16040,<br>445.11899,<br>355.06915,<br>301.14035                                                         | 623.16187 | 1.940 |                                                                                                             |      | [35]                   |
| 8  | 45.77 | Phenylpropa<br>noids | Magnoloside B                  | $C_{35}H_{46}O_{20}$ | 786.25770 |           |        |                                                                                                                                         | 785.25043 | 0.713 | 215.00966,<br>649.34503,<br>623.30731,<br>477.22992                                                         |      | [32]                   |
| 9  | 48.45 | Flavonoids           | Chrysoeriol 6,8-di-C-glucoside | $C_{28}H_{32}O_{16}$ | 624.16849 | 625.17542 | -1.426 | 647.15747,<br>648.16089,<br>626.17889,<br>445.11951,<br>355.06955,<br>301.14063                                                         |           |       |                                                                                                             |      | [35]                   |
| 10 | 50.82 | Flavonoids           | Schaftoside                    | $C_{26}H_{28}O_{14}$ | 564.14736 | 565.15497 | -0.375 | 587.13690,<br>403.13608,<br>271.26309                                                                                                   | 563.14081 | 2.270 | 545.20935,<br>503.27216,<br>473.18585,<br>443.71747,<br>425.22198,<br>413.17181,<br>383.12177,<br>353.13043 |      | [36],<br>[37],<br>[37] |

|    |       |                      |                             |                                                               |           |           |        |                                                                   |           |         |                                                                   |               |
|----|-------|----------------------|-----------------------------|---------------------------------------------------------------|-----------|-----------|--------|-------------------------------------------------------------------|-----------|---------|-------------------------------------------------------------------|---------------|
| 11 | 52.92 | Phenylpropa<br>noids | Magnoloside A               | C <sub>29</sub> H <sub>36</sub> O <sub>15</sub>               | 624.20487 |           |        |                                                                   | 623.19769 | 1.03226 | 461.22223,<br>315.28967                                           | [38]          |
| 12 | 54.92 | Alkaloids            | Asimilobine                 | C <sub>17</sub> H <sub>17</sub> O <sub>2</sub> N              | 267.12538 | 268.13275 | -1.698 | 251.10626,<br>236.08293,<br>219.08015,<br>191.08522               |           |         |                                                                   |               |
| 13 | 55.67 | Flavonoids           | Glucoliquiritin<br>apioside | C <sub>32</sub> H <sub>40</sub> O <sub>18</sub>               | 712.22092 | 713.22858 | -0.225 | 735.21588,<br>569.31350,<br>257.08054                             | 711.21375 | 0.927   | 417.11877,<br>255.06598                                           | [37],<br>[39] |
| 14 | 56.36 | Flavonoids           | Liquiritin                  | C <sub>21</sub> H <sub>22</sub> O <sub>9</sub>                | 418.12583 | 419.13321 | -1.071 | 441.11447,<br>257.08035,<br>163.0381,<br>147.04376                | 417.11902 | 2.425   | 417.11902,<br>255.06601,<br>153.01935,<br>135.00897,<br>119.05056 | [40],<br>[41] |
| 15 | 57.72 | Flavonoids           | Rutin                       | C <sub>27</sub> H <sub>30</sub> O <sub>16</sub>               | 610.15284 | 611.16003 | -1.033 | 593.33093,<br>575.13361,<br>557.18365,<br>473.12170,<br>353.34692 | 609.14563 | 1.016   |                                                                   | [33]          |
| 16 | 58.41 | Flavonoids           | Luteolin-7-rutinoside       | C <sub>27</sub> H <sub>30</sub> O <sub>15</sub>               | 594.15792 | 595.16486 | -1.490 | 449.12097,<br>287.12695                                           | 593.15051 | 0.697   | 443.17529,<br>285.02246                                           | [34]          |
| 17 | 59.27 | Flavonoids           | Eriocitrin                  | C <sub>27</sub> H <sub>32</sub> O <sub>15</sub>               | 596.17357 |           |        |                                                                   | 595.16656 | 1.367   |                                                                   | [35]          |
| 18 | 59.88 | Alkaloids            | Xanthoplanine               | C <sub>21</sub> H <sub>26</sub> O <sub>4</sub> N <sup>+</sup> | 356.18563 | 356.18469 | -2.653 | 311.12698,<br>296.10706,<br>280.13892                             |           |         |                                                                   | [42]          |
| 19 | 61.84 | Phenylpropa<br>noids | Magnoloside M               | C <sub>29</sub> H <sub>36</sub> O <sub>16</sub>               | 625.20487 |           |        |                                                                   | 623.19745 | 1.03226 | 461.32123,<br>315.11142                                           | [42]          |
| 20 | 62.19 | Flavonoids           | Naringin                    | C <sub>27</sub> H <sub>32</sub> O <sub>14</sub>               | 580.17866 | 581.18512 | -2.343 | 603.16656,<br>582.18866,<br>419.13254,<br>435.12738,<br>273.07501 | 579.17133 | 0.860   | 271.06073                                                         | [43]          |

|    |       |                      |                                                                                |                                                 |           |           |        |                                                                                 |           |                                       |                                                                                               |                        |
|----|-------|----------------------|--------------------------------------------------------------------------------|-------------------------------------------------|-----------|-----------|--------|---------------------------------------------------------------------------------|-----------|---------------------------------------|-----------------------------------------------------------------------------------------------|------------------------|
| 21 | 64.67 | Phenylpropa<br>noids | Verbascoside                                                                   | C <sub>29</sub> H <sub>36</sub> O <sub>15</sub> | 624.20487 |           |        | 623.19684                                                                       | -0.332    | 215.00951,<br>461.27814,<br>315.15555 | [42]                                                                                          |                        |
| 22 | 64.85 | Flavonoids           | Hesperidin                                                                     | C <sub>28</sub> H <sub>34</sub> O <sub>15</sub> | 610.18922 | 611.19647 | -0.944 | 633.17767,<br>449.14334,<br>303.08575,<br>465.13812,<br>431.13306,<br>413.12250 | 609.18201 | 1.007                                 | 301.07135                                                                                     | [44]                   |
| 23 | 66.23 | Flavonoids           | Limocitrin-3-O-(3-<br>hydroxy-3-<br>methylglut-arate)-<br>glucoside or isomers | C <sub>29</sub> H <sub>32</sub> O <sub>17</sub> | 652.16340 | 653.17053 | -1.065 | 675.15210,<br>347.07553                                                         | 651.15643 | 1.312                                 | 549.12494                                                                                     | [35]                   |
| 24 | 67.71 | Flavonoids           | Liquiritigenin-7-O-D-<br>apiosyl-4'-O-D-<br>glucoside                          | C <sub>26</sub> H <sub>30</sub> O <sub>13</sub> | 550.16809 | 551.17462 | -2.354 | 257.08026                                                                       | 549.16119 | 1.680                                 | 417.15961,<br>255.16119                                                                       | [36]                   |
| 25 | 68.63 | Flavonoids           | Liquiritin apioside                                                            | C <sub>26</sub> H <sub>30</sub> O <sub>13</sub> | 550.16809 | 551.17566 | -0.467 | 419.13327,<br>257.08066                                                         | 549.16113 | 1.571                                 | 255.04315                                                                                     | [40],<br>[45],<br>[46] |
| 26 | 68.78 | Flavonoids           | Ononin                                                                         | C <sub>22</sub> H <sub>22</sub> O <sub>9</sub>  | 430.12583 | 431.13324 | -0.971 | 453.11487,<br>269.08044                                                         |           |                                       |                                                                                               | [37].                  |
| 27 | 69.01 | Flavonoids           | Isoliquiritin                                                                  | C <sub>21</sub> H <sub>22</sub> O <sub>9</sub>  | 418.12583 | 419.13327 | -0.927 | 257.03751                                                                       | 417.11896 | 2.281                                 | 255.04541                                                                                     | [40],<br>[45],<br>[47] |
| 28 | 69.55 | Phenylpropa<br>noids | Magnolignan C                                                                  | C <sub>18</sub> H <sub>20</sub> O <sub>4</sub>  | 300.13561 |           |        |                                                                                 | 299.12866 | 2.923                                 | 239.00793,<br>221.12096,<br>174.95628,<br>146.96623,<br>144.00957<br>417.15088,<br>399.29071, | [48]                   |
| 29 | 69.93 | Flavonoids           | 6'-Acetyl liquiritin                                                           | C <sub>23</sub> H <sub>24</sub> O <sub>10</sub> | 460.13640 |           |        |                                                                                 | 459.12949 | 1.997                                 | 255.03796,<br>297.11273,<br>137.01698                                                         | [37]                   |

|    |       |                       |                                                           |                                                               |           |           |        |                                                     |           |         |                                                                                                                          |               |
|----|-------|-----------------------|-----------------------------------------------------------|---------------------------------------------------------------|-----------|-----------|--------|-----------------------------------------------------|-----------|---------|--------------------------------------------------------------------------------------------------------------------------|---------------|
| 30 | 70.16 | Flavonoids            | Licorice glycoside B                                      | C <sub>35</sub> H <sub>36</sub> O <sub>15</sub>               | 696.20487 | 697.21228 | -0.598 |                                                     | 695.19714 | 0.134   | 549.16119,<br>531.15070,<br>417.11884,<br>255.06584<br>695.19733,<br>549.27191,<br>531.20392,<br>399.23151,<br>255.12831 | [37],<br>[49] |
| 31 | 71.33 | Flavonoids            | Licorice glycoside A                                      | C <sub>36</sub> H <sub>38</sub> O <sub>16</sub>               | 726.21544 |           |        |                                                     | 725.20758 | -0.043  |                                                                                                                          | [37],<br>[47] |
| 32 | 72.48 | Flavonoids            | Didymin or Poncirin                                       | C <sub>28</sub> H <sub>34</sub> O <sub>14</sub>               | 594.19431 | 595.20166 | -0.793 | 617.18329,<br>449.14359,<br>433.14874<br>700.54614, |           |         |                                                                                                                          | [35]          |
| 33 | 74.25 | Alkaloids             | Citrusin III                                              | C <sub>36</sub> H <sub>53</sub> N <sub>7</sub> O <sub>9</sub> | 727.38993 | 728.39697 | -1.074 | 587.42694,47<br>4.33710<br>679.29767,               | 726.38232 | 0.299   |                                                                                                                          | [50]          |
| 34 | 74.42 | Triterpenoid saponins | Dihydroxy glycyrrhizic acid                               | C <sub>42</sub> H <sub>62</sub> O <sub>18</sub>               | 854.39307 | 855.40045 | -0.516 | 503.38794,<br>467.33405<br>1007.44531,              | 853.38538 | 0.163   |                                                                                                                          | [36]          |
| 35 | 74.61 | Triterpenoid saponins | Licorice saponin A3                                       | C <sub>48</sub> H <sub>72</sub> O <sub>21</sub>               | 984.45606 | 985.46381 | -0.077 | 965.29164,<br>647.37854,<br>453.33566               | 983.44910 | 0.879   |                                                                                                                          | [40],<br>[49] |
| 36 | 75.66 | Flavonoids            | Natsudaïdain 3-(4-O-3-hydroxy-3-methylglutaroylglucoside) | C <sub>33</sub> H <sub>40</sub> O <sub>18</sub>               | 724.22092 | 725.22772 | -1.407 | 747.20917,<br>726.23114,<br>419.13263               | 723.21362 | 0.73200 | 417.11871                                                                                                                | [35]          |
| 37 | 76.57 | Phenylpropanoids      | Magnolignan A                                             | C <sub>18</sub> H <sub>20</sub> O <sub>4</sub>                | 300.13561 |           |        |                                                     | 299.12866 | 2.92300 | 239.06659,<br>221.09616,<br>146.96605,<br>144.00941                                                                      | [48]          |
| 38 | 77.10 | Triterpenoid saponins | 24-Hydroxy-3beta-[(2-O-beta-D-glucopyranuronosyl-beta-D-  | C <sub>42</sub> H <sub>60</sub> O <sub>17</sub>               | 836.38250 | 837.39026 | -0.080 |                                                     | 835.37482 | 0.17200 | 659.44513,<br>351.08698                                                                                                  | [45]          |

| glucopyranuronosyl)<br>oxy]-11-oxo-22beta-<br>hydroxyoleana-12-<br>ene-30-oic acid<br>gamma-lactone |       |                          |                     |                                                               |           |           |        |                                                                                                             |           |         |                                       |                                  |
|-----------------------------------------------------------------------------------------------------|-------|--------------------------|---------------------|---------------------------------------------------------------|-----------|-----------|--------|-------------------------------------------------------------------------------------------------------------|-----------|---------|---------------------------------------|----------------------------------|
| 39                                                                                                  | 78.06 | Alkaloids                | Citrusin I          | C <sub>34</sub> H <sub>53</sub> N <sub>7</sub> O <sub>9</sub> | 703.38993 | 704.39673 | -1.452 | 726.37848,<br>686.47504,55<br>5.23513<br>293.07755,<br>167.03352,                                           |           |         |                                       | [33]                             |
| 40                                                                                                  | 78.47 | Flavonoids               | Alpinetin           | C <sub>16</sub> H <sub>14</sub> O <sub>4</sub>                | 270.08866 | 271.09583 | -2.418 | 131.04883,<br>103.05396,<br>90.88628<br>395.10941,<br>343.15536,<br>358.14450,<br>329.06317                 | 269.08139 | 2.06100 |                                       |                                  |
| 41                                                                                                  | 79.67 | Flavonoids               | Isosinensetin       | C <sub>20</sub> H <sub>20</sub> O <sub>7</sub>                | 372.12035 | 373.12753 | -1.740 |                                                                                                             |           |         |                                       | [33]                             |
| 42                                                                                                  | 79.73 | Triterpenoid<br>saponins | Licorice saponin E2 | C <sub>42</sub> H <sub>60</sub> O <sub>16</sub>               | 820.38759 |           |        |                                                                                                             | 819.38019 | 0.52200 | 643.54840,<br>351.16757               | [39],                            |
| 43                                                                                                  | 80.62 | Triterpenoid<br>saponins | Glycyrrhizic acid   | C <sub>42</sub> H <sub>62</sub> O <sub>16</sub>               | 822.40324 | 823.41040 | -0.804 | 845.39178,<br>647.37793,<br>471.34567,<br>453.33508<br>831.41229,<br>633.39856,<br>457.36639                | 821.39618 | 0.93500 | 351.09686,<br>645.56256,<br>803.50635 | [40],                            |
| 44                                                                                                  | 82.08 | Triterpenoid<br>saponins | Licorice saponin B2 | C <sub>42</sub> H <sub>64</sub> O <sub>15</sub>               | 808.42397 | 809.43073 | -1.319 | 845.39154,<br>647.37775,<br>471.34552,<br>453.33484<br>395.10947,<br>358.20599,<br>343.22675,<br>312.09213, | 807.41681 | 0.821   | 351.12073,<br>631.41876               | [36],<br>[46]                    |
| 45                                                                                                  | 82.47 | Triterpenoid<br>saponins | Licorice saponin H2 | C <sub>42</sub> H <sub>62</sub> O <sub>16</sub>               | 822.40324 | 823.41034 | -0.877 |                                                                                                             |           |         |                                       | [40],<br>[36],<br>[45],<br>[37]. |
| 46                                                                                                  | 82.61 | Flavonoids               | Sinensetin          | C <sub>20</sub> H <sub>20</sub> O <sub>7</sub>                | 372.12035 | 373.12766 | -1.392 |                                                                                                             |           |         |                                       | [33]                             |

|    |       |                       |                                          |                                                 |           |           |        |                                                                                |           |       |                                                                   |                                  |      |
|----|-------|-----------------------|------------------------------------------|-------------------------------------------------|-----------|-----------|--------|--------------------------------------------------------------------------------|-----------|-------|-------------------------------------------------------------------|----------------------------------|------|
| 47 | 82.78 | Flavonoids            | Tetramethyl-O-isoscutellarein            | C <sub>19</sub> H <sub>18</sub> O <sub>6</sub>  | 342.10979 | 343.11725 | -1.063 | 329.10526,<br>340.15942<br>365.09909,<br>344.12064,<br>313.07040,<br>250.17741 |           |       |                                                                   |                                  | [51] |
| 48 | 83.20 | Triterpenoid saponins | Licorice saponin K2                      | C <sub>42</sub> H <sub>62</sub> O <sub>16</sub> | 822.40324 | 823.41040 | -0.804 | 845.39203,<br>647.37817,<br>471.34604,<br>453.33545                            | 821.39581 | 0.485 | 803.57916,<br>645.48639,<br>469.36035,<br>351.07977               | [40],<br>[36],<br>[45],<br>[37]. |      |
| 49 | 83.81 | Triterpenoid saponins | Licorice saponin J2                      | C <sub>42</sub> H <sub>64</sub> O <sub>16</sub> | 824.41889 | 825.42584 | -1.057 | 847.40717,<br>453.33521                                                        |           |       |                                                                   | [40],<br>[52]                    |      |
| 50 | 83.82 | Phenylpropa noids     | Isomagnolol                              | C <sub>18</sub> H <sub>18</sub> O <sub>2</sub>  | 266.13013 |           |        |                                                                                | 265.12311 | 3.031 | 216.01256,<br>215.00948,<br>174.95593,<br>146.96590,<br>144.00929 | [53]                             |      |
| 51 | 84.09 | Lactones              | Limonin                                  | C <sub>26</sub> H <sub>30</sub> O <sub>8</sub>  | 470.19352 | 471.20056 | -1.664 | 453.23090,<br>425.28485,<br>367.16846,<br>161.02158                            | 469.18668 | 2.101 |                                                                   | [33]                             |      |
| 52 | 84.96 | Phenylpropa noids     | Magnaldehyde D                           | C <sub>16</sub> H <sub>14</sub> O <sub>3</sub>  | 254.09375 |           |        |                                                                                | 253.08691 | 3.909 | 235.07635,<br>215.00981,<br>174.95621                             | [48]                             |      |
| 53 | 85.60 | Flavonoids            | Nobiletin                                | C <sub>21</sub> H <sub>22</sub> O <sub>8</sub>  | 402.13092 | 403.13824 | -1.250 | 425.11978,<br>827.25214,<br>373.09167,<br>388.11517<br>339.28171,              |           |       |                                                                   | [43]                             |      |
| 54 | 86.05 | Aromatic hydrocarbon  | 4-Butylbenzoic acid, tridec-2-ynyl ester | C <sub>24</sub> H <sub>36</sub> O <sub>2</sub>  | 356.27098 | 357.27814 | -1.867 | 321.26703,<br>275.16193                                                        |           |       |                                                                   |                                  |      |
| 55 | 86.20 | Aromatic hydrocarbon  | 6-Gingerol                               | C <sub>17</sub> H <sub>26</sub> O <sub>4</sub>  | 294.18256 | 295.17346 | -1.736 | 317.17178,<br>277.17944,                                                       |           |       |                                                                   | [54],<br>[55]                    |      |

|    |       |                      |                                                   |                                                |           |           |        |                                                                   |           |       |                                                                                 |               |
|----|-------|----------------------|---------------------------------------------------|------------------------------------------------|-----------|-----------|--------|-------------------------------------------------------------------|-----------|-------|---------------------------------------------------------------------------------|---------------|
|    |       |                      |                                                   |                                                |           |           |        | 259.16885,<br>177.09056                                           |           |       |                                                                                 |               |
| 56 | 86.94 | Phenylpropa<br>noids | Randainal                                         | C <sub>18</sub> H <sub>16</sub> O <sub>3</sub> | 280.10940 |           |        |                                                                   | 279.10257 | 3.580 | 261.09186,<br>215.00964,<br>248.96021,<br>242.94332,<br>261.08942,<br>233.17661 | [38]          |
| 57 | 86.99 | Flavonoids           | Pinocembrin                                       | C <sub>15</sub> H <sub>12</sub> O <sub>4</sub> | 256.07301 | 257.08026 | -2.238 | 152.87318,<br>130.89072,<br>102.90588,<br>90.97833                | 255.06569 | 1.979 |                                                                                 | [56]          |
| 58 | 87.30 | Phenylpropa<br>noids | Glycoumarin                                       | C <sub>21</sub> H <sub>20</sub> O <sub>6</sub> | 368.12544 | 369.13278 | -1.313 | 341.23120,<br>327.17776,<br>313.17673,<br>285.09848               |           |       |                                                                                 | [40],<br>[47] |
| 59 | 87.60 | Flavonoids           | 3,5,6,7,8,3',4'-<br>Heptamethoxy<br>flavone       | C <sub>22</sub> H <sub>24</sub> O <sub>9</sub> | 432.14148 | 433.14856 | -1.729 | 455.12944,<br>887.27319,<br>888.27643,<br>418.12561,<br>403.10217 |           |       |                                                                                 | [51]          |
| 60 | 89.06 | Flavonoids           | Tangeretin                                        | C <sub>20</sub> H <sub>20</sub> O <sub>7</sub> | 372.12035 | 373.12766 | -1.392 | 395.10941,<br>767.23053,<br>358.15698,<br>343.12009,<br>325.12558 |           |       |                                                                                 | [44]          |
| 61 | 90.46 | Flavonoids           | Licochalcone A                                    | C <sub>21</sub> H <sub>22</sub> O <sub>4</sub> | 338.15126 | 339.15884 | -0.724 | 297.12061,<br>271.06317,<br>245.11261                             | 337.14404 | 1.793 | 187.08160                                                                       | [49]          |
| 62 | 90.75 | Flavonoids           | Licoflavonol                                      | C <sub>20</sub> H <sub>18</sub> O <sub>6</sub> | 354.10979 |           |        |                                                                   | 353.10281 | 2.394 | 285.18896                                                                       | [45],<br>[46] |
| 63 | 92.06 | Flavonoids           | 5-Hydroxy-6,7,8,3',4'-<br>pentamethoxy<br>flavone | C <sub>20</sub> H <sub>20</sub> O <sub>8</sub> | 388.11527 | 389.12262 | -1.218 | 411.09378,<br>518.32318,<br>352.33905,                            |           |       |                                                                                 | [33]          |

|    |       |                      |                      |                                                |           |           |        |                                                                                                                                       |           |       |                                                                                                                         |               |
|----|-------|----------------------|----------------------|------------------------------------------------|-----------|-----------|--------|---------------------------------------------------------------------------------------------------------------------------------------|-----------|-------|-------------------------------------------------------------------------------------------------------------------------|---------------|
| 64 | 92.31 | Flavonoids           | Cardamonin           | C <sub>16</sub> H <sub>14</sub> O <sub>4</sub> | 270.08866 | 271.09607 | -1.532 | 335.21893,<br>163.03874,<br>149.02303<br>167.03363,<br>131.04889,<br>103.01764,<br>90.97807                                           | 269.08170 | 3.213 | 254.09070,<br>226.02644,<br>165.07042,<br>138.90138<br>250.09950,<br>224.08372,<br>215.00948                            | [38]          |
| 65 | 93.86 | Phenylpropa<br>noids | Honokiol             | C <sub>18</sub> H <sub>18</sub> O <sub>2</sub> | 266.13013 |           |        |                                                                                                                                       | 265.12305 | 2.805 |                                                                                                                         |               |
| 66 | 93.96 | Flavonoids           | Natsudaïdain         | C <sub>21</sub> H <sub>22</sub> O <sub>9</sub> | 418.12583 | 419.13315 | -1.214 | 411.09329,<br>371.10098,<br>359.24005,<br>352.33914,<br>149.02307                                                                     |           |       |                                                                                                                         | [35]          |
| 67 | 95.05 | Flavonoids           | Licoisoflavone B     | C <sub>20</sub> H <sub>16</sub> O <sub>6</sub> | 352.09414 | 353.10150 | -1.316 | 233.15326,<br>187.14774<br>215.14285,<br>187.14786,<br>145.10101,<br>131.08530<br>213.12708,<br>185.13211,<br>157.10095,<br>143.08527 | 351.08694 | 1.781 | 283.10434,<br>265.07629                                                                                                 | [46]          |
| 68 | 95.13 | Lactones             | Costunolide          | C <sub>15</sub> H <sub>20</sub> O <sub>2</sub> | 232.14578 | 233.15343 | -0.757 |                                                                                                                                       |           |       |                                                                                                                         | [57],<br>[41] |
| 69 | 96.37 | Lactones             | Dehydrocostuslactone | C <sub>15</sub> H <sub>18</sub> O <sub>2</sub> | 230.13013 | 231.13770 | -1.109 |                                                                                                                                       |           |       |                                                                                                                         | [57],<br>[41] |
| 70 | 96.67 | Phenylpropa<br>noids | Obovatol             | C <sub>18</sub> H <sub>18</sub> O <sub>3</sub> | 282.12505 |           |        |                                                                                                                                       | 281.11816 | 3.341 | 240.04395,<br>164.02255,<br>133.04956<br>247.11214,<br>245.09665,<br>215.00925<br>265.12311,<br>277.21689,<br>195.13872 | [42]          |
| 71 | 97.24 | Phenylpropa<br>noids | Magnolol             | C <sub>18</sub> H <sub>18</sub> O <sub>2</sub> | 266.13013 |           |        |                                                                                                                                       | 265.12259 | 1.070 |                                                                                                                         | [38]          |
| 72 | 99.48 | Fatty acids          | (±) 9-HODE           | C <sub>18</sub> H <sub>32</sub> O <sub>3</sub> | 296.23460 |           |        |                                                                                                                                       | 295.22760 | 2.807 |                                                                                                                         | [48]          |



---

|    |        |         |           |                                   |           |           |        |                                                                                                            |
|----|--------|---------|-----------|-----------------------------------|-----------|-----------|--------|------------------------------------------------------------------------------------------------------------|
| 73 | 102.41 | Ketones | Alnustone | C <sub>19</sub> H <sub>18</sub> O | 262.13522 | 263.14249 | -2.097 | 171.98802,<br>157.01140,<br>147.05292,<br>133.06444,<br>129.01965,<br>116.90790,<br>105.06956,<br>91.00671 |
|----|--------|---------|-----------|-----------------------------------|-----------|-----------|--------|------------------------------------------------------------------------------------------------------------|

---
